# Supplementary material for: Explaining the Individual Challenges Experienced of Women Affected by Neuromyelitis Optica and Multiple Sclerosis: A Comparative Content Analysis Study
Source: Research Square preprint supplement (doi:10.21203/rs.3.rs-150219/v1), 2021-02-03
Supplement: Supplementary file 1 [file 77395f880fdf094bbc3789a3.docx]

Appendix 1: Semi-structured interview questions related to MS / NMOSD

| 1. What effect does this disease have on the life of a person with MS / NMOSD? Can you give an example? How about you? How and why? |
| --- |
| 1. How does a person with MS / NMOSD experience their daily life? Can you explain? |
| 1. What physical / mental problems are experienced by patients with MS or NMOSD? How about you? (If the answer is not complete, ask about yourself) |
| 1. How did you feel after your doctor diagnosed you with MS or NMOSD? (We can ask in the third person) |
| 1. What is the treatment problems experienced in women with MS or NMOSD? |
| 1. What was your problem? Can you give an example? How? Why? |
| 1. What is the experience of physical / mental problems in MS / NMOSD? Can you explain? How about you? |
